# Supplementary material
Source: Royal Society of Chemistry journal article supplement (doi:10.1039/d6cc01827k)
Supplement: d6cc01827k1.pdf [file d6cc01827k1.pdf]

## Supplementary Information

### **Dual Confinement Stabilizes highly dispersed Ru clusters for Efficient and Durable Ammonia Decomposition**

Haoran Wang<sup>a,b</sup>, Qin Liu<sup>c</sup>, Zhenhao Hou<sup>b\*</sup>, Shaojun Qing<sup>d</sup>, and Wentuan Bi<sup>a,b\*</sup>

a. School of Materials Science and Engineering, Anhui University of Science and Technology, Huainan 232001, P. R. China.

b. Institute of Energy, Hefei Comprehensive National Science Center (Anhui Energy Laboratory), Hefei, 230031, P. R. China.

c. Key Laboratory of Precision and Intelligent Chemistry, University of Science and Technology of China, Hefei, 230026, P. R. China.

d. School of Carbon Neutrality Science and Engineering, Anhui University of Science and Technology, Hefei 231131, P. R. China.

## Characterizations

XRD test (Rigaku SmartLab, Cu K $\alpha$ ,  $\lambda=0.15418$  nm) : Place approximately 20 mg of the powder catalyst sample on a slide, flatten it with a cover slip, and insert it into the instrument at a step speed of 10 °/min. HR-TEM (JEM-2100Plus, 200 kV): A small amount of powder sample was placed in anhydrous ethanol, ultrasonically dispersed for a certain period of time, and then dropped onto a copper mesh for TEM and EDS (Oxford X-MAX 80T) characterization. ICP-OES (Thermo Scientific iCAP PRO): Take 5 mg of the sample and place it in a hydrothermal reactor, add 1 ml of aqua regia, and put it in an oven at 160 °C to maintain for 6 hours. Filter the obtained solution and make up to 10 ml for testing. RAMAN (HORIBA XploRA Plus): Approximately 20 mg of the powder catalyst sample was flattened and placed on a slide. The test was conducted with a Laser at 532 nm and a filter at 25%. The XPS test was conducted using Thermo Scientific K-Alpha (Al-K $\alpha$  excitation source), binding energy calibration standard (C 1s=284.8 eV as internal reference), and spectrum fitting method, ensuring the reproducibility and rigor of the characterization data. TPD tests were conducted on a BEL Japan BelCata II analyzer coupled with a BEL Japan BelMass mass spectrometer. A 90 mg sample was pretreated at 500°C for 30 min in a 10 vol% NH<sub>3</sub>/Ar mixture (30 mL/min). After cooling to 50 °C, the sample was purged with the same 10% NH<sub>3</sub>/Ar (30 mL/min) for 1 h to reach saturated NH<sub>3</sub> adsorption. Subsequently, the gas was switched to pure He (30 mL/min) and purged until a stable baseline was achieved. Finally, the sample was heated from room temperature to 600°C at a rate of 10°C/min under pure He flow (30 mL/min), and the TPD profile was recorded. The signals of NH<sub>3</sub> (m/z = 17), H<sub>2</sub> (m/z = 2), and N<sub>2</sub> (m/z = 28) were detected by mass spectrometry. In-situ DRIFTS measurements for CO adsorption were carried out on a Thermo Nicolet IS50 Fourier-transform infrared (FT-IR) spectrometer, equipped with an in-situ diffuse reflectance cell from Hefei In-Situ Technology Co., Ltd. (China), and the model of the diffuse reflectance accessory is CIS-IRDROA-SD. ZnSe windows were used, and a mercury-cadmium-telluride (MCT) detector was adopted. The test parameters were set as: wavenumber range 4000-650 cm<sup>-1</sup>, resolution 4 cm<sup>-1</sup>, 4 scans, and data interval 1 cm<sup>-1</sup>.

## Sample Nomenclature

Commercial CeO<sub>2</sub> powder, commercial nano-CeO<sub>2</sub> powder, and the CeO<sub>2</sub>/SiO<sub>2</sub> support are denoted as CeO<sub>2</sub>, CeO<sub>2</sub>-NM, and CeO<sub>2</sub>/SiO<sub>2</sub>, respectively.

The Ru-supported samples were designated as Ru/ CeO<sub>2</sub>, Ru/ CeO<sub>2</sub>-NM, and Ru/ CeO<sub>2</sub>/SiO<sub>2</sub>, respectively.

## Material Synthesis Method

CeO<sub>2</sub>/SiO<sub>2</sub>: The CeO<sub>2</sub>/SiO<sub>2</sub> composite was synthesized by first adding 360 mg of fumed silica powder (Macklin, specific surface area: 400 m<sup>2</sup> g<sup>-1</sup>) into 50 mL of deionized water under continuous stirring, followed by ultrasonic treatment until complete dispersion was achieved. Add 170 mg of Ce(NO<sub>3</sub>)<sub>3</sub>·6H<sub>2</sub>O (Macklin, 99.99%) to the above solution under vigorous stirring until the solid was completely dissolved. Then, a 1 mol/L KOH solution was added dropwise to adjust the pH of the mixture to approximately 10, followed by continued stirring for 3-5 minutes. The filtered solid was collected using vacuum filtration and dried overnight at 60 °C. The resulting solid was then ground into a fine powder and calcined at 600 °C for 12 hours to obtain the final CeO<sub>2</sub>/SiO<sub>2</sub> support.

Ru/CeO<sub>2</sub>/SiO<sub>2</sub>, Ru/CeO<sub>2</sub> and Ru/CeO<sub>2</sub>-NM: The Ru/CeO<sub>2</sub>/SiO<sub>2</sub> catalyst was synthesized via the incipient wetness impregnation method. A precursor aqueous solution (volume = saturated water absorption volume of the support) was prepared by dissolving RuCl<sub>3</sub>·xH<sub>2</sub>O (Aladdin, 99.95%) in deionized water. 300 mg of CeO<sub>2</sub>/SiO<sub>2</sub>, cerium oxide (Aladdin, 99.9%) and nano-cerium oxide (Aladdin, 20–50 nm, 99.5%) powder was impregnated with the Ru precursor solution at mass loadings of 2%, respectively. The

precursor solution was added until the solution barely covered the solid material, and the mixture was dried overnight at room temperature. The resulting solid was then calcined at 500 °C for 2 hours in a muffle furnace to obtain the final Ru/CeO<sub>2</sub>/SiO<sub>2</sub>, Ru/CeO<sub>2</sub> and Ru/CeO<sub>2</sub>-NM catalyst powder.

The elemental contents of all Ru-loaded samples were measured using ICP-OES (as shown in Table S1).

### Ammonia Decomposition Catalytic Performance Test

The evaluation of ammonia decomposition catalysts for hydrogen production was conducted in a fixed-bed reactor. A total of 100 mg catalyst was loaded into the reactor with quartz wool support. Then introduced 99.9 vol% NH<sub>3</sub>, and the catalytic performance was evaluated within the temperature range of 300-550 °C. The reaction was carried out at atmospheric pressure with a weight hourly space velocity (WHSV) of 12000 mL g<sub>cat</sub><sup>-1</sup> h<sup>-1</sup>. The composition of the effluent gas was analyzed using an online gas chromatograph (GC-7960 PLUS, KAIZE) equipped with thermal conductivity detector (TCD).

$$X_{NH_3}(\%) = \frac{[NH_3]_{in} - [NH_3]_{out}}{[NH_3]_{in}} \times 100\% \quad (1)$$

$$r_{H_2}(\text{mmol } g_{Ru}^{-1} \text{ min}^{-1}) = \frac{\frac{V_{NH_3}}{22.4} \times X_{NH_3} \times 1.5}{m_{Ru}} \quad (2)$$

The ammonia conversion rate and the hydrogen production rate were calculated using above equations, where  $[NH_3]_{in}$  and  $[NH_3]_{out}$  represent the volumetric flow rates of ammonia entering and exiting the reactor, and  $X_{NH_3}$  denotes the ammonia conversion rate.  $V_{NH_3}$  represents the ammonia flow rate, 22.4 is the molar volume of gas under standard conditions (L/mol),  $X_{NH_3}$  is the ammonia decomposition conversion rate, and  $m_{Ru}$  is the mass of Ru in the catalyst.

**Table S1** Metal composition of supported Ru catalyst

| Sample                                | Ru content (wt%) | Ce content (wt%) |
|---------------------------------------|------------------|------------------|
| Ru/CeO <sub>2</sub> /SiO <sub>2</sub> | 2.26%            | 15.11%           |
| Ru/CeO <sub>2</sub>                   | 2.23%            |                  |
| Ru/CeO <sub>2</sub> -NM               | 2.47%            |                  |

| Catalyst                                 | Ru (%) | T (°C) | WHSV<br>( $\text{g}_{\text{cat}}^{-1} \text{h}^{-1}$ ) | (mL<br>Conv. (%) | H <sub>2</sub> formation rate<br>( $\text{mmol g}_{\text{Ru}}^{-1} \text{min}^{-1}$ ) | Ref.      |
|------------------------------------------|--------|--------|--------------------------------------------------------|------------------|---------------------------------------------------------------------------------------|-----------|
| Ru/MgO (111)                             | 3.1    | 400    | 30,000                                                 | 69               | 745                                                                                   | 1         |
| Ru/MgO (111)                             | 3.1    | 450    | 30,000                                                 | 100              | 1,080                                                                                 | 1         |
| Ru/La <sub>0.33</sub> Ce <sub>0.68</sub> | 1.8    | 450    | 6,000                                                  | 100              | 372                                                                                   | 2         |
| Ru/La <sub>0.33</sub> Ce <sub>0.68</sub> | 1.8    | 450    | 30,000                                                 | 79               | 1,472                                                                                 | 2         |
| Ru/Ce <sub>1</sub>                       | 1.8    | 450    | 6,000                                                  | 98               | 367                                                                                   | 2         |
| Ru-K/Al <sub>2</sub> O <sub>3</sub>      | 4.6    | 450    | 30,000                                                 | 35               | 254                                                                                   | 3         |
| RuLaCs/Al <sub>2</sub> O <sub>3</sub>    | 1.0    | 450    | 5,000                                                  | 99               | 558                                                                                   | 4         |
| RuLaCs/Al <sub>2</sub> O <sub>3</sub>    | 1.0    | 400    | 5,000                                                  | 82               | 458                                                                                   | 4         |
| Ru/C12A7: e <sup>-</sup>                 | 2.2    | 400    | 15,000                                                 | 70               | 532                                                                                   | 5         |
| Ru/C12A7: e <sup>-</sup>                 | 2.2    | 450    | 15,000                                                 | 99               | 759                                                                                   | 5         |
| Ru/BHA                                   | 2.7    | 450    | 60,000                                                 | 21               | 507                                                                                   | 6         |
| Ru/BHA                                   | 3.0    | 450    | 30,000                                                 | 42               | 423                                                                                   | 6         |
| Ru/MgO                                   | 2.8    | 450    | 30,000                                                 | 41               | 493                                                                                   | 7         |
| Ru/MgO                                   | 0.8    | 450    | 60,000                                                 | 38               | 2,092                                                                                 | 8         |
| Ru/MgO                                   | 1.7    | 450    | 22,000                                                 | 83               | 1,198                                                                                 | 8         |
| Ru/MgO-DP                                | 3.5    | 450    | 30,000                                                 | 56               | 540                                                                                   | 9         |
| Ru/La <sub>2</sub> O <sub>3</sub>        | 4.8    | 450    | 18,000                                                 | 73               | 304                                                                                   | 10        |
| Ru/CeO <sub>2</sub>                      | 2.0    | 450    | 6,000                                                  | 98               | 330                                                                                   | 11        |
| Ru/Sm <sub>2</sub> O <sub>3</sub> -p     | 2.0    | 450    | 30,000                                                 | 56               | 916                                                                                   | 12        |
| Ru/c-MgO                                 | 2.9    | 450    | 30,000                                                 | 75               | 866                                                                                   | 13        |
| Ru/CeO <sub>2</sub> -CNTs                | 1.5    | 450    | 30,000                                                 | 70               | 1,464                                                                                 | 14        |
| Ru/SiO <sub>2</sub>                      | 10     | 450    | 30,000                                                 | 36               | 112                                                                                   | 15        |
| Ru/CeO <sub>2</sub> /SiO <sub>2</sub>    | 2.2    | 450    | 36,000                                                 | 64               | 1,169                                                                                 | This work |
| Ru/CeO <sub>2</sub> /SiO <sub>2</sub>    | 2.2    | 450    | 60,000                                                 | 57               | 1,735                                                                                 | This work |

**Table S2** Performance comparison

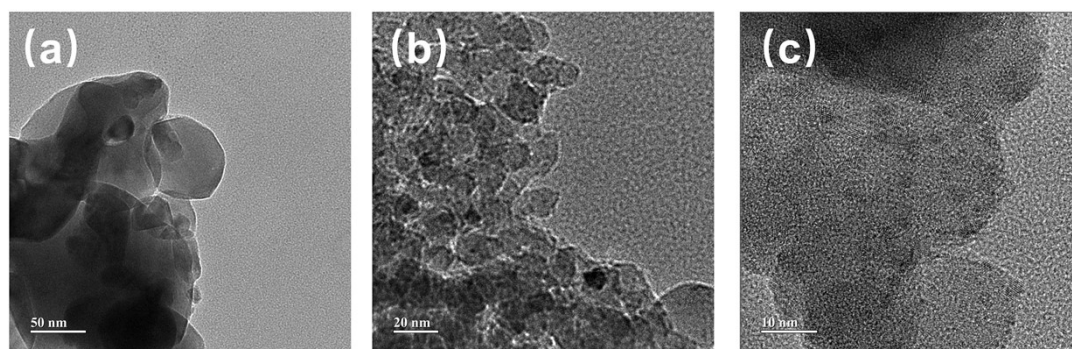

**Fig. S1** TEM image of (a) 2%Ru/CeO<sub>2</sub>; (b) 2%Ru/CeO<sub>2</sub>-NM; (c) 2%Ru/CeO<sub>2</sub>/SiO<sub>2</sub>.

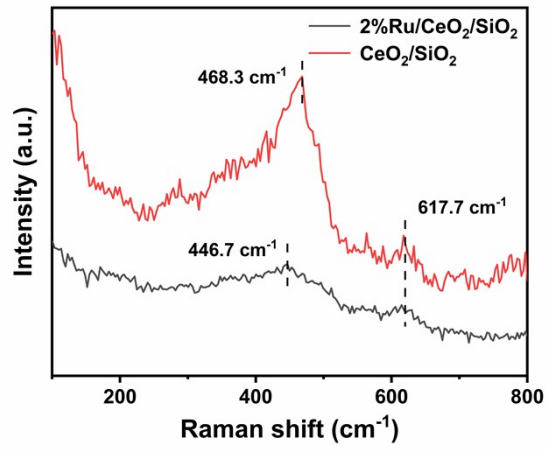

**Fig. S2** Raman spectra of 2%Ru/CeO<sub>2</sub>/SiO<sub>2</sub> and CeO<sub>2</sub>/SiO<sub>2</sub>.

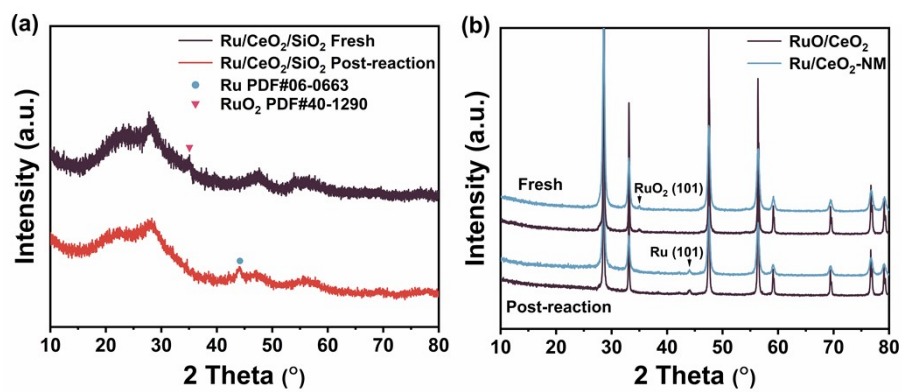

**Fig. S3** The XRD patterns before and after the reaction (a) 2%Ru/CeO<sub>2</sub>/SiO<sub>2</sub>; (b) 2%Ru/CeO<sub>2</sub> and Ru/CeO<sub>2</sub>-NM.

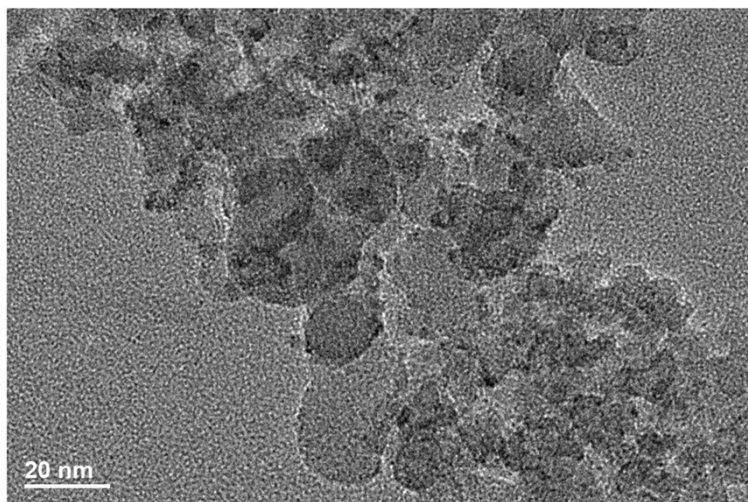

**Fig. S4** TEM image of 2%Ru/CeO<sub>2</sub>/SiO<sub>2</sub> catalyst after 50 hours of stability test.

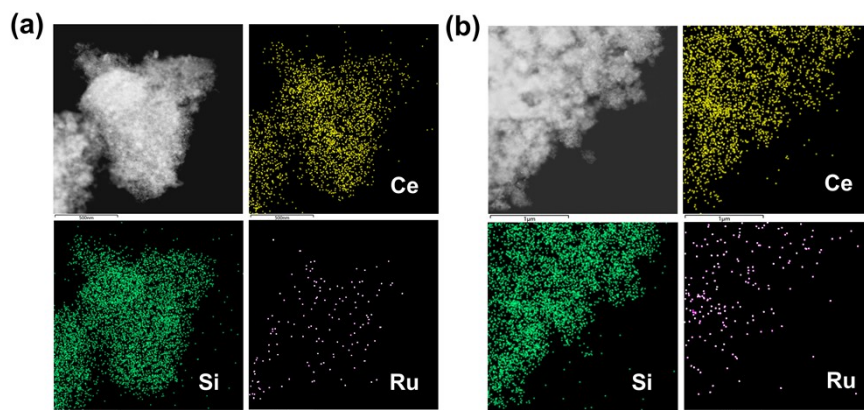

**Fig. S5** EDS mapping of (a) 2%Ru/CeO<sub>2</sub>/SiO<sub>2</sub>; (b) 2%Ru/CeO<sub>2</sub>/SiO<sub>2</sub> after 50 hours of stability test.

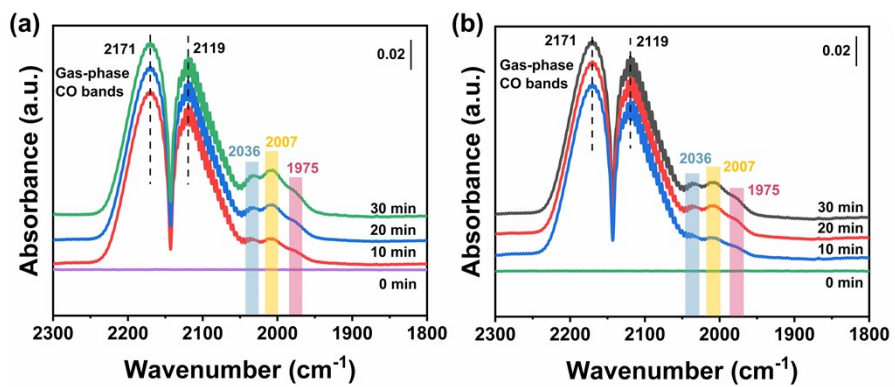

**Fig. S6** In-situ DRIFTS spectrum of CO adsorption on 2%Ru/CeO<sub>2</sub>/SiO<sub>2</sub> (a) Fresh sample; (b) Post-reaction sample.

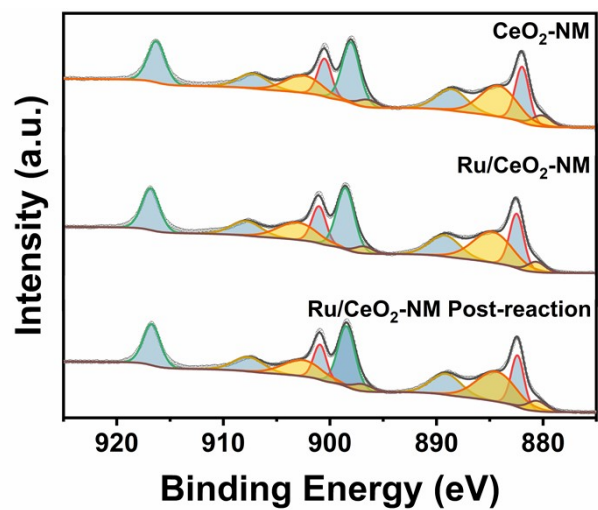

Fig. S7 XPS spectra of Ce 3d of 2%Ru/CeO<sub>2</sub>-NM.

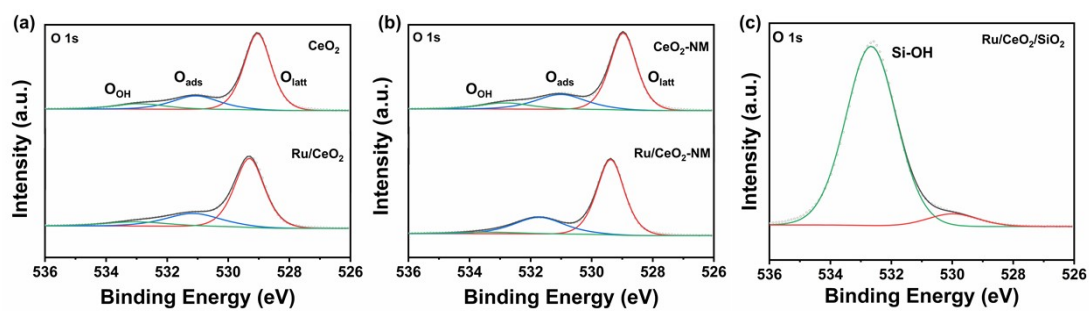

**Fig. S8** XPS spectra of O 1s of (a) CeO<sub>2</sub> and 2%Ru/CeO<sub>2</sub>; (b) CeO<sub>2</sub>-NM and 2%Ru/CeO<sub>2</sub>-NM; (c) Ru/CeO<sub>2</sub>/SiO<sub>2</sub>.

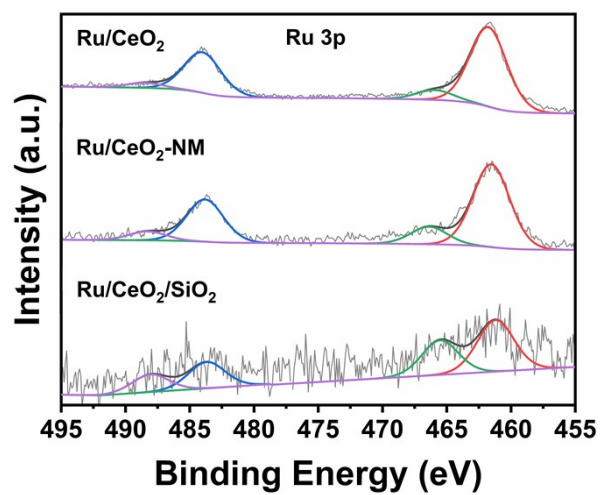

Fig. S9 XPS spectra of Ru 3p of post-reaction samples.

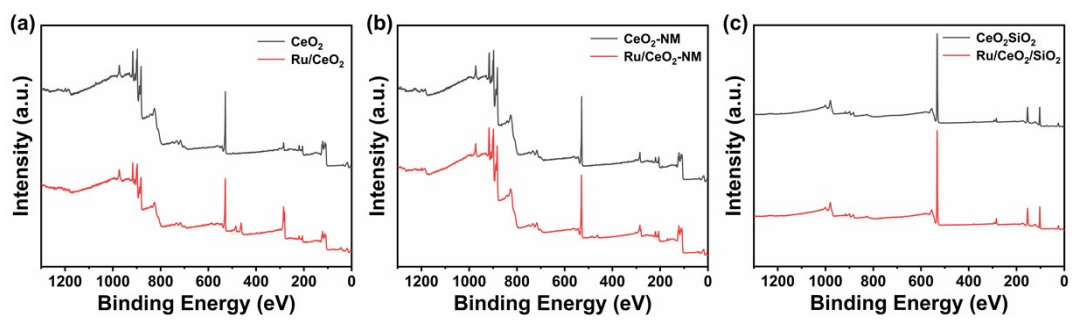

**Fig. S10** The wide-scan XPS spectrum of the samples.

## References

1. H. Fang, S. Wu, T. Ayvali, J. Zheng, J. Fellowes, P.-L. Ho, K. C. Leung, A. Large, G. Held, R. Kato, K. Suenaga, Y. I. A. Reyes, H. V. Thang, H.-Y. T. Chen and S. C. E. Tsang, *Nat. Commun.*, 2023, **14**.
2. T. A. Le, Y. Kim, H. W. Kim, S.-U. Lee, J.-R. Kim, T.-W. Kim, Y.-J. Lee and H.-J. Chae, *Appl. Catal. B- Environ.*, 2021, **285**, 119831.
3. Q. Su, L. L. Gu, A. H. Zhong, Y. Yao, W. J. Ji, W. P. Ding and C. T. Au, *Catal. Lett.*, 2018, **148**, 894-903.
4. Z. Wang, H. Luo, L. Wang, T. Li, S. Li and Y.-Q. Liu, *ACS Sustain. Chem. Eng.*, 2024, **12**, 5620-5631.
5. F. Hayashi, Y. Toda, Y. Kanie, M. Kitano, Y. Inoue, T. Yokoyama, M. Hara and H. Hosono, *Chem. Sci.*, 2013, **4**, 3124-3130.
6. Z. Wang, Z. Cai and Z. Wei, *ACS Sustain. Chem. Eng.*, 2019, **7**, 8226-8235.
7. J. Zhang, H. Xu, Q. Ge and W. Li, *Catal. Commun.*, 2006, **7**, 148-152.
8. X.-C. Hu, W.-W. Wang, R. Si, C. Ma and C.-J. Jia, *Sci. China:Chem.*, 2019, **62**, 1625-1633.
9. X. Ju, L. Liu, P. Yu, J. Guo, X. Zhang, T. He, G. Wu and P. Chen, *Appl. Catal. B-Environ.*, 2017, **211**, 167-175.
10. C. Huang, Y. Yu, J. Yang, Y. Yan, D. Wang, F. Hu, X. Wang, R. Zhang and G. Feng, *Appl. Surf. Sci.*, 2019, **476**, 928-936.
11. J. Feng, X. Zhang, J. Wang, X. Ju, L. Liu and P. Chen, *Catal. Sci. Technol.*, 2021, **11**, 6330-6343.
12. X. Zhang, L. Liu, J. Feng, X. Ju, J. Wang, T. He and P. Chen, *Catal. Sci. Technol.*, 2021, **11**, 2915-2923.
13. X. Ju, L. Liu, X. Zhang, J. Feng, T. He and P. Chen, *ChemCatChem*, 2019, **11**, 4161-4170.
14. L. Lv, P. Chu, T. Han, Y. Jiang, Z. Wang, Y. Liu, H. Dai, L. Wei and J. Deng, *Angew. Chem., Int. Ed.*, 2025, **64**.
15. T. V. Choudhary, C. Sivadinarayana and D. W. Goodman, *Catal. Lett.*, 2001, **72**, 197-201.
